# Supplementary material for: NCDs-COVID19 Preventions, Environmental – Nutrition Perspective Approach; (The Case of Tanzanian Students)
Source: Research Square preprint supplement (doi:10.21203/rs.3.rs-145327/v2), 2021-03-30
Supplement: Supplementary file 1 [file 1660eab12aaa5264f8f66b42.docx]

***Table 1a; demonstrates the model of fitting Table 1b;illustrates the Goodness-of-Fit of the tool***

|  | Chi-Square | df | Sig. |
| --- | --- | --- | --- |
| Environmental |  |  |  |
| Pearson | 107.608 | 56 | .000 |
| Deviance | 97.402 | 56 | .001 |

| Model | -2 Log Likelihood | Chi-Square | df | Sig. |
| --- | --- | --- | --- | --- |
| Environmental |  |  |  |  |
| Intercept Only | 266.038 |  |  |  |
| Final | 227.680 | 38.358 | 8 | .000 |

Table 2; demonstrate the frequency distribution of demographic characteristics

| ***Social-demographic factors*** | ***Item*** | ***f*** | ***%*** |
| --- | --- | --- | --- |
|  |  |  |  |
| Age | 16-17 | 186 | 31.0 |
|  | 18-19 | 330 | 55.0 |
|  | 20-21 | 84 | 14.0 |
|  |  |  |  |
| Gender | Male | 272 | 45.3 |
|  | Female | 328 | 54.7 |
|  |  |  |  |
| Education level | ordinary level | 74 | 12.3 |
|  | advanced | 526 | 87.7 |
|  |  |  |  |
| Subject | Science | 273 | 45.5 |
|  | Economic | 128 | 21.3 |
|  | Arts | 129 | 21.5 |
|  | General | 70 | 11.7 |

Table3; association between knowledge and social-demographic characteristics (age, sex, education and subject specialize

| ***Variable*** | | ***NCDs prevention education*** | | | | | | | | | | | | | | | | | | | | ***statistics*** | | |
| --- | --- | --- | --- | --- | --- | --- | --- | --- | --- | --- | --- | --- | --- | --- | --- | --- | --- | --- | --- | --- | --- | --- | --- | --- |
| Age | | S/agreed | | | | | Agree | | | | Neutral | | | S/disagree | | | | Disagree | | | |  | | |
| 16-17 | | 186.000(10.5%) | | | | | 217.000 (12.3%) | | | | 87.000 (4.9%) | | | 57.000 (3.2%) | | | | 16.000 (.9%) | | | | Chi-square=62.820  df =8  P =.000 | | |
| 18-19 | | 383.000 (21.7%) | | | | | 369.000 (20.9%) | | | | 95.000 (5.4%) | | | 84.000 (4.8%) | | | | 34.000 (1.9%) | | | |
| 20-21 | | 63.000 (3.6%) | | | | | 91.000 (5.1%) | | | | 36.000 (2.0%) | | | 19.000 (1.1%) | | | | 30.000 (1.7%) | | | |
| sex | | | | | | | | | | | | | | | | | | | | | | | | |
| Male | 273.000 (15.4%) | | | | 275.000 (15.6%) | | | | 124.000(7.0%) | | | | 89.000 (5.0%) | | | | 33.000 (1.9%) | | | | Chi-square= 26.267  df =4  P =.000 | | | |
| Female | 359.000 (20.3%) | | | | 402.000 (22.8%) | | | | 94.000 (5.3%) | | | | 71.000 (4.0%) | | | | 47.000 (2.7%) | | | |
| Level of .education | | | | | | | | | | | | | | | | | | | | | | | | |
| Ordinal | | | 89.000 (5.0%) | | | 85.000 (4.8%) | | | | 30.000 (1.7%) | | | | | 23.000 (1.3%) | | | | 11.000 (.6%) | | | | Chi-square= 823  df =4  P =..935 | |
| Advanced | | | 543.000 (30.7%) | | | 592.000 (33.5%) | | | | 188.000(10.6% | | | | | 137.000 (7.8%) | | | | 69.000(3.9%) | | | |
| By Subject specialization | | | | | | | | | | | | | | | | | | | | | | | | |
| sciences | | | | 257.000 (14.5%) | | | | 295.000 (16.7%) | | | | 136.000 (7.7%) | | | | 42.000 (2.4%) | | | | 39.000 (2.2%) | | | | Chi-square= 74.548  df =12  P =..000 |
| economic | | | | 140.000 (7.9%) | | | | 167.000 (9.5% ) | | | | 19.000 (1.1%) | | | | 40.000 (2.3%) | | | | 22.000 (1.2%) | | | |
| Arts | | | | 148.000 (8.4%) | | | | 127.000 (7.2%) | | | | 37.000(2.1%) | | | | 55.000(3.1%) | | | | 9.000 (.5%) | | | |
| General knowledge | | | | 87.000 (4.9%) | | | | 88.000 (5.0%) | | | | 26.000 (1.5% | | | | 23.000 (1.3%) | | | | 10.000 (.6%) | | | |

Table 4; shows the responses of the participants on their nutrition knowledge on NCDs prevention

***Variable f (%) %(600)***

Balance diet consumption prevent NCD’s Disagreed 163 27.2

Neutral 89 14.8

Agreed 348 58.0

Fruits and Vitamin (FV) campaign reduce NCDs outbreak.

Disagreed 247 41.5

Neutral 131 21.8

Agreed 232 36.7

Good food policy, support the movement of NCD’s prevention.

Disagreed 133 22.1

Neutral 118 19.7

Agreed 349 68.1

A good food law practice is one way of NCDs prevention

Disagreed 107 17.9

Neutral 89 14.8

Agreed 404 67.3

Reduction of processed food helps to prevent NCDs.

Disagreed 85 12.5

Neutral 157 26.2

Agreed 378 61.4

Raise the price of processed foods reduce NCD’s.

Disagreed 246 41.0

Neutral 100 16.7

Agreed 254 43.4

Raise the price of GMO foods help to decrease NCD’s.

Disagreed 217 36.1

Neutral 144 24.0

Agreed 239 39.9

Proper food budget reduces NCD’s outbreak.

Disagreed 116 19.4

Neutral 80 13.3

Agreed 404 67.4

Nutrition analyses help to prevent NCD’s.

Disagreed 174 29.0

Neutral 96 16.0

Agreed 330 55.0

HACCP

Disagreed 17 2.9

Neutral 95 15.8

Agreed 488 81.3

Active Physical activity prevents NCD’s.

Disagreed 126 21.0

Neutral 81 13.5

Agreed 393 65.5

Riding a bicycle is one way of fighting a NCD’s

Disagreed 227 37.9

Neutral 99 16.5

Agreed 274 45.6

Table 5; illustrate the statistical approval on nutrition perspective approach (n = 600) percentage total 100 % responses

|  | | B/ diet | | | FV comp | food policy |  | food law P | | | Moveable garden | Processed foods | | | GMO food | food budget | | Nutrition analysis | | | HACCP | | | Physical activity | | Riding bicycle | | |
| --- | --- | --- | --- | --- | --- | --- | --- | --- | --- | --- | --- | --- | --- | --- | --- | --- | --- | --- | --- | --- | --- | --- | --- | --- | --- | --- | --- | --- |
| Valid | | 600 | | | 600 | 600 |  | 600 | | | 600 | 600 | | | 600 | 600 | | | 600 | 600 | | | 600 | | | | 600 | | |
| Missing | | 0 | | | 0 | 0 |  | 0 | | | 0 | 0 | | | 0 | 0 | | | 0 | 0 | | | 0 | | | | 0 | | |
| Median | 4.00 | | | 3.00 | | 4.00 | 4.00 | |  | 3.00 | | | 3.00 | 3.00 | | 4.00 | 4.00 | | | | 4.00 | 4.00 | | | 3.00 | | |
| Std. D | 1.285 | | | 1.302 | | 1.222 | 1.179 | |  | 1.274 | | | 1.362 | 1.272 | | 1.197 | 1.296 | | | | .802 | 1.237 | | | 1.357 | | |
| Range | 4 | | | 4 | | 4 | 4 | |  | 4 | | | 4 | 4 | | 4 | 4 | | | | 4 | 4 | | | 4 | | |
| Percentiles | 25 | | 2.00 | 2.00 | | 3.00 | 3.00 | |  | 2.00 | | | 2.00 | 2.00 | | 3.00 | 2.00 | | | | 4.00 | 3.00 | | | 2.00 | | |
| 50 | | 4.00 | 3.00 | | 4.00 | 4.00 | |  | 3.00 | | | 3.00 | 3.00 | | 4.00 | 4.00 | | | | 4.00 | 4.00 | | | 3.00 | | |
| 75 | | 4.00 | 4.00 | | 5.00 | 5.00 | |  | 4.00 | | | 4.00 | 4.00 | | 5.00 | 4.00 | | | | 5.00 | 5.00 | | | 4 .00 | | |

| ***Item*** | ***F(n=600)*** | ***%( 100)*** |
| --- | --- | --- |
| Environment Education speed up NCDs- prevention. |  |  |
| Disagreed | 86 | 14.3 |
| Neutral | 73 | 12.2 |
| Agreed | 441 | 73.5 |
| Environment protections interrelated to NCDs prevention. |  |  |
| Disagreed | 92 | 15.3 |
| Neutral | 84 | 14.0 |
| Agreed | 424 | 70.7 |
| The environment management prevents NCD’s |  |  |
| Disagreed | 204 | 34.0 |
| Neutral | 95 | 15.8 |
| Agreed | 301 | 50.1 |
| Sustainable agriculture practices prevent NCD’s |  |  |
| Disagreed | 138 | 23 |
| Neutral | 118 | 19.7 |
| Agreed | 344 | 57.3 |
| Moveable garden initiate NCDs prevention |  |  |
| Disagreed | 192 | 32 |
| Neutral | 144 | 24.0 |
| Agreed | 264 | 44 |
| Fruits trees plantation complain around stress, home and school |  |  |
| Disagreed | 170 | 28.3 |
| Neutral | 120 | 20.0 |
| Agreed | 310 | 51.6 |
| Reforestation is a source of NCDs reduction. |  |  |
| Disagreed | 155 | 25.8 |
| Neutral | 120 | 20.0 |
| Agreed | 325 | 54.1 |
| Close monitor of imported equipment’s reduce NCD’s |  |  |
| Disagreed | 147 | 25.5 |
| Neutral | 88 | 14.7 |
| Agreed | 365 | 60.8 |

Table 6;Demonstrate the frequency distribution of student knowledge on Environmental perspective on NCD’s-COVID19 Prevention

|  |
| --- |

Table 7Statistical level of environmental knowledge among Tanzanian secondary students on NCDs-COVID 19 prevention

|  |  | Environment protections. | Environment Education. | Environment management. | Imported equipment’s | Reforestation | Sustainable agriculture | Moveable garden initiate | Fruits trees plantation |
| --- | --- | --- | --- | --- | --- | --- | --- | --- | --- |
| N | Valid | 600 | 600 | 600 | 600 | 600 | 600 | 600 | 600 |
| Missing | 0 | 0 | 0 | 0 | 0 | 0 | 0 | 0 |
| Mean | | 3.84 | 3.88 | 3.22 | 3.52 | 3.42 | 3.48 | 3.19 | 3.36 |
| Median | | 4.00 | 4.00 | 4.00 | 4.00 | 4.00 | 4.00 | 3.00 | 4.00 |
| Mode | | 4 | 4 | 4 | 4 | 4 | 4 | 4 | 4 |
| Std. Deviation | | 1.130 | 1.125 | 1.353 | 1.272 | 1.216 | 1.222 | 1.274 | 1.283 |
| Variance | | 1.277 | 1.265 | 1.830 | 1.619 | 1.479 | 1.492 | 1.622 | 1.646 |
| Range | | 4 | 4 | 4 | 4 | 4 | 4 | 4 | 4 |
| Percentiles | 25 | 3.00 | 3.00 | 2.00 | 3.00 | 2.00 | 3.00 | 2.00 | 2.00 |
| 50 | 4.00 | 4.00 | 4.00 | 4.00 | 4.00 | 4.00 | 3.00 | 4.00 |
| 75 | 5.00 | 5.00 | 4.00 | 4.00 | 4.00 | 4.00 | 4.00 | 4.00 |

| **.** |
| --- |
